# Supplementary material
Source: PubMed Central journal article supplement (PMC6644213)
Supplement: ao8b02492_si_002.pdf [file ao8b02492_si_002.pdf]

*Supporting Information for:*

## All Thiophene-Based Double Helix: Synthesis, Crystal Structure, Chiroptical Property and Arylation

Bingbing Li,<sup>†</sup> Sheng Zhang,<sup>†</sup> Lu Li,<sup>\*,‡</sup> Zhiying Ma,<sup>†</sup> Chunli Li,<sup>†</sup> Li Xu<sup>§</sup> and Hua Wang<sup>\*,†</sup>

<sup>†</sup> Engineering Research Center for Nanomaterials, Henan University, Kaifeng, 475004, P. R. China

<sup>‡</sup> School of Chemistry and Chemical Engineering, Shangqiu Normal University, Shangqiu, 476000, P. R. China

<sup>§</sup> College of Chemistry and Chemical Engineering, Henan University, Kaifeng, 475004, P. R. China

### Table of Contents:

|                                                                                     |    |
|-------------------------------------------------------------------------------------|----|
| <b>NMR, HRMS and IR Spectra of DH-1</b> .....                                       | 1  |
| <b>NMR, HRMS and IR Spectra of DH-1-Br</b> .....                                    | 3  |
| <b>NMR, HRMS and IR Spectra of DH-1-Ph</b> .....                                    | 5  |
| <b>NMR, HRMS and IR Spectra of DH-1-Th</b> .....                                    | 7  |
| <b>Resolution of rac-DH-1</b> .....                                                 | 9  |
| <b>Table S1. X-ray crystallographic data of DH-1</b> .....                          | 9  |
| <b>Figure S18. Calculated absorption spectra of DH-1, DH-1-Ph and DH-1-Th</b> ..... | 10 |
| <b>Table S2. Theoretical calculations</b> .....                                     | 11 |

# NMR, HRMS and IR Spectra of DH-1

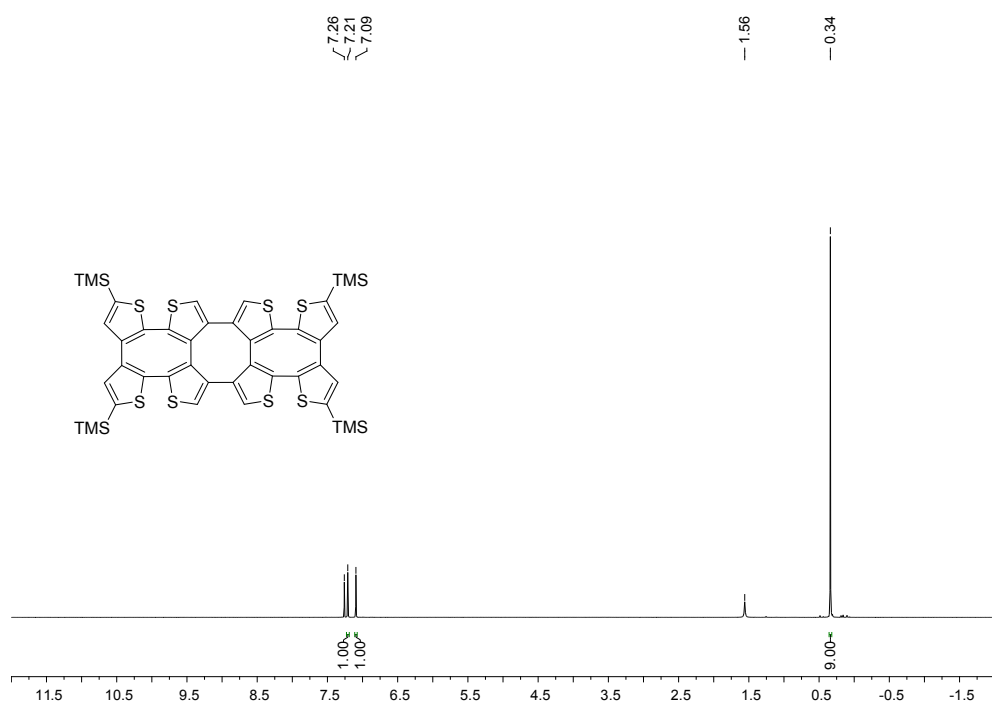

Figure S1. <sup>1</sup>H NMR (CDCl<sub>3</sub>, 400 MHz) spectrum of DH-1

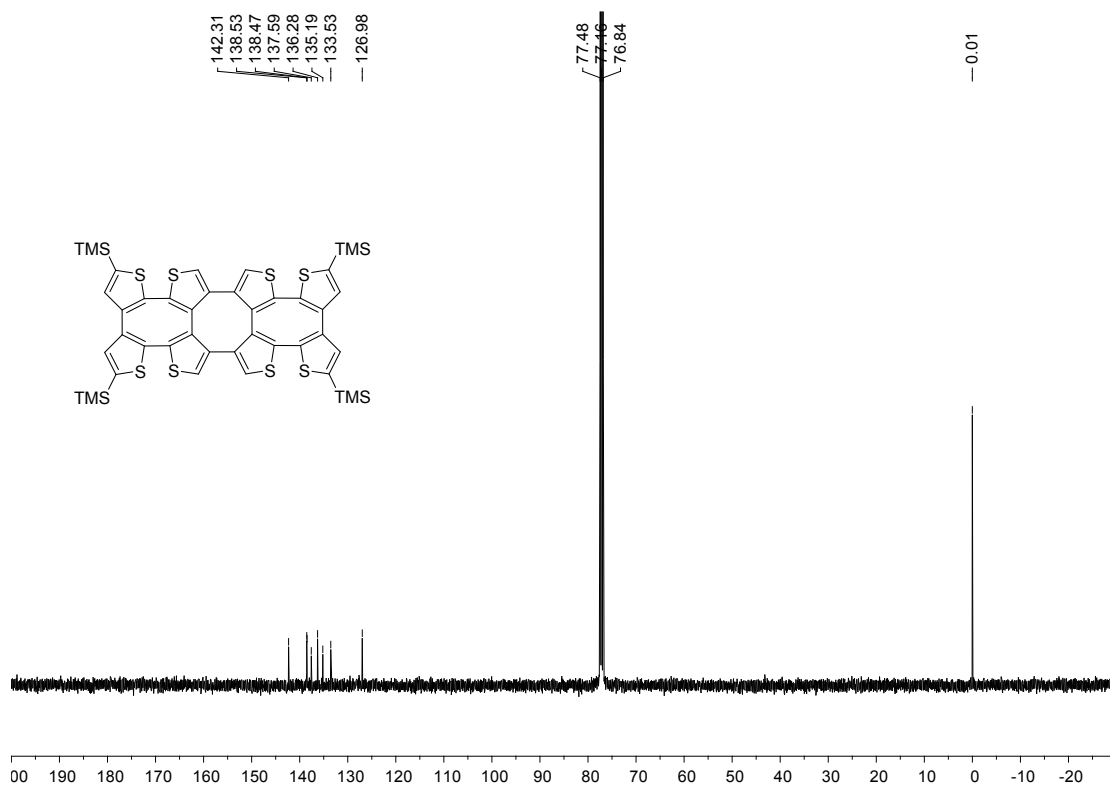

Figure S2. <sup>13</sup>C NMR (CDCl<sub>3</sub>, 100 MHz) spectrum of DH-1

Instrument: IonSpec 4.7 Tesla FTMS

Card Serial Number : W113 2069

Sample Serial Number: zs-3-187-col-pp

Operator : HuaQin Date: 2013/10/16

Operation Mode: MALDI/DHB

### Elemental Composition Search Report:

Target Mass:  
Target m/z = 940.0261 ± 0.004  
Charge = +1

#### Possible Elements:

| Element | Exact Mass | Min | Max |
|---------|------------|-----|-----|
| C       | 12.000000  | 0   | 100 |
| H       | 1.007825   | 0   | 100 |
| Si      | 27.976927  | 0   | 5   |
| S       | 31.972071  | 0   | 9   |

#### Additional Search Restrictions:

DBE Limit Mode = Both Integer and Half-Integer  
Minimum DBE = 0

#### Search Results:

Number of Hits = 5

| m/z       | Delta m/z | DBE  | Formula                                                                      |
|-----------|-----------|------|------------------------------------------------------------------------------|
| 940.02602 | 0.00008   | 55.0 | C <sub>64</sub> H <sub>20</sub> Si <sub>2</sub> S <sub>3</sub> <sup>+1</sup> |
| 940.02466 | 0.00144   | 28.0 | C <sub>47</sub> H <sub>40</sub> Si <sub>4</sub> S <sub>7</sub> <sup>+1</sup> |
| 940.02803 | -0.00193  | 23.0 | C <sub>44</sub> H <sub>44</sub> Si <sub>4</sub> S <sub>8</sub> <sup>+1</sup> |
| 940.02939 | -0.00329  | 50.0 | C <sub>61</sub> H <sub>24</sub> Si <sub>2</sub> S <sub>4</sub> <sup>+1</sup> |
| 940.02265 | 0.00345   | 60.0 | C <sub>67</sub> H <sub>16</sub> Si <sub>2</sub> S <sub>2</sub> <sup>+1</sup> |

Figure S3. HRMS data of DH-1

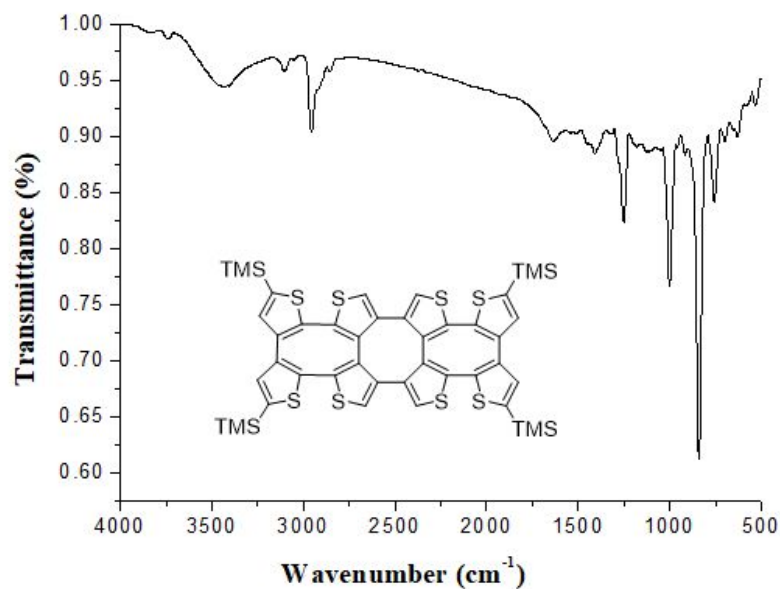

Figure S4. IR spectrum of DH-1

## NMR, HRMS and IR Spectra of DH-1-Br

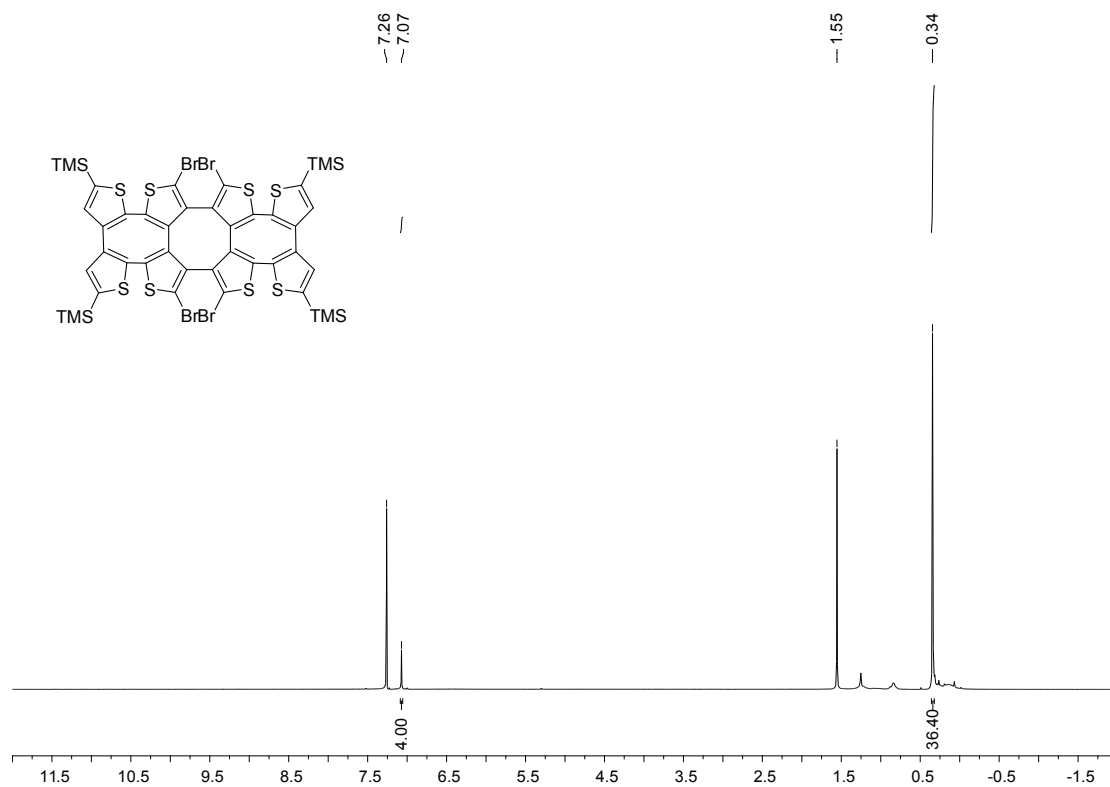

Figure S5. <sup>1</sup>H NMR (CDCl<sub>3</sub>, 400 MHz) spectrum of DH-1-Br

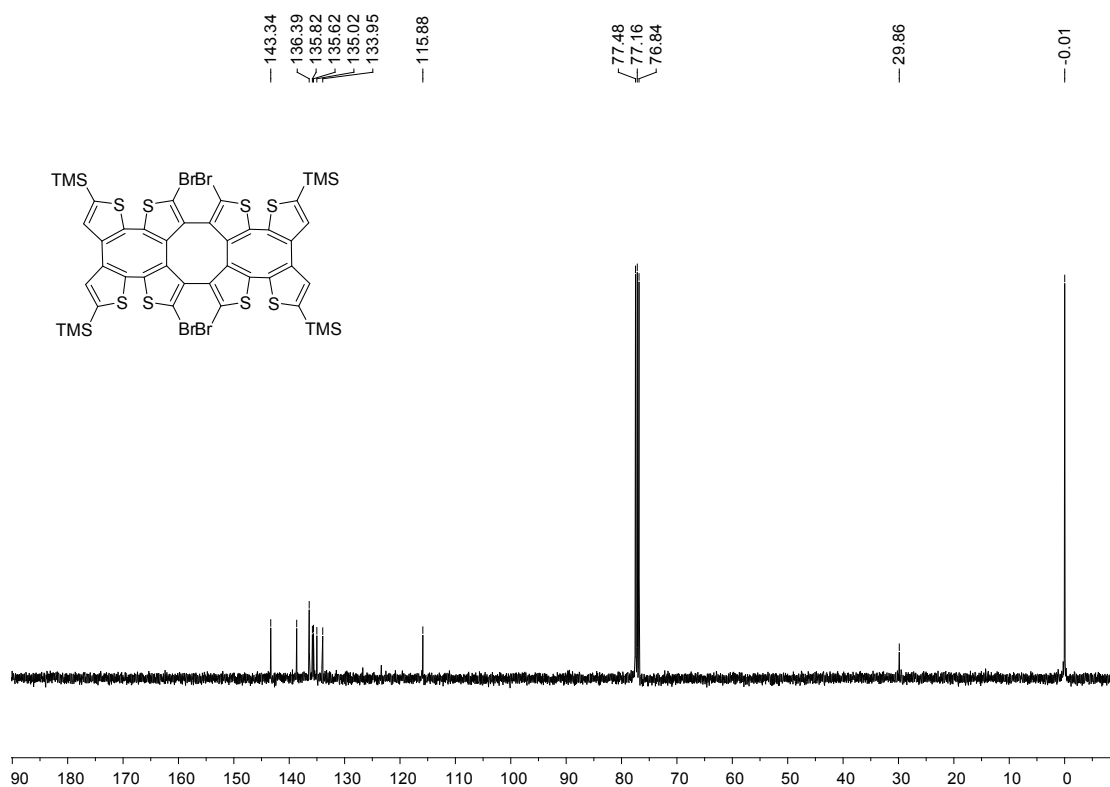

Figure S6. <sup>13</sup>C NMR (CDCl<sub>3</sub>, 100 MHz) spectrum of DH-1-Br

**LBB-4BrOH**: HRMS (ESI)  $m/z$  calcd for  $C_{44}H_{41}Br_4S_8Si_4^+$  (M+H)<sup>+</sup> 1252.67790, found

1252.68481.

0003# 34 RT: 0.66 AV: 1 NL: 1.7E4  
T: FTMS+pESI Full.ms[400.00-2000.00]

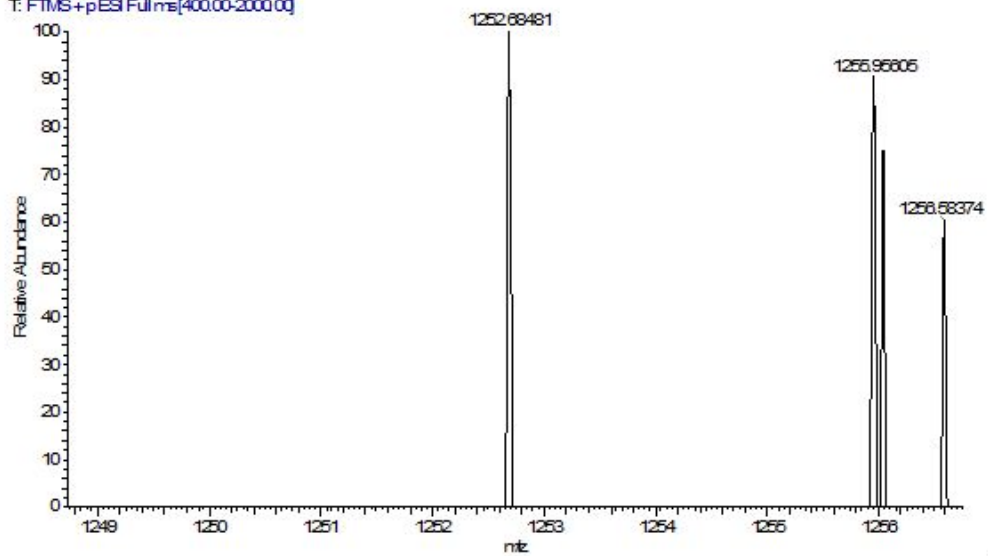

Figure S7. HRMS spectrum of **DH-1-Br**

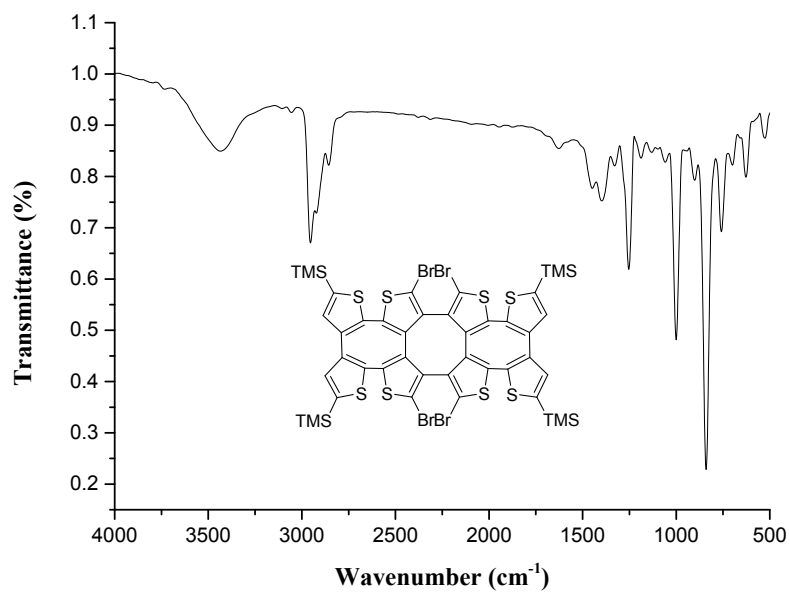

Figure S8. IR spectrum of **DH-1-Br**

# NMR, HRMS and IR Spectra of DH-1-Ph

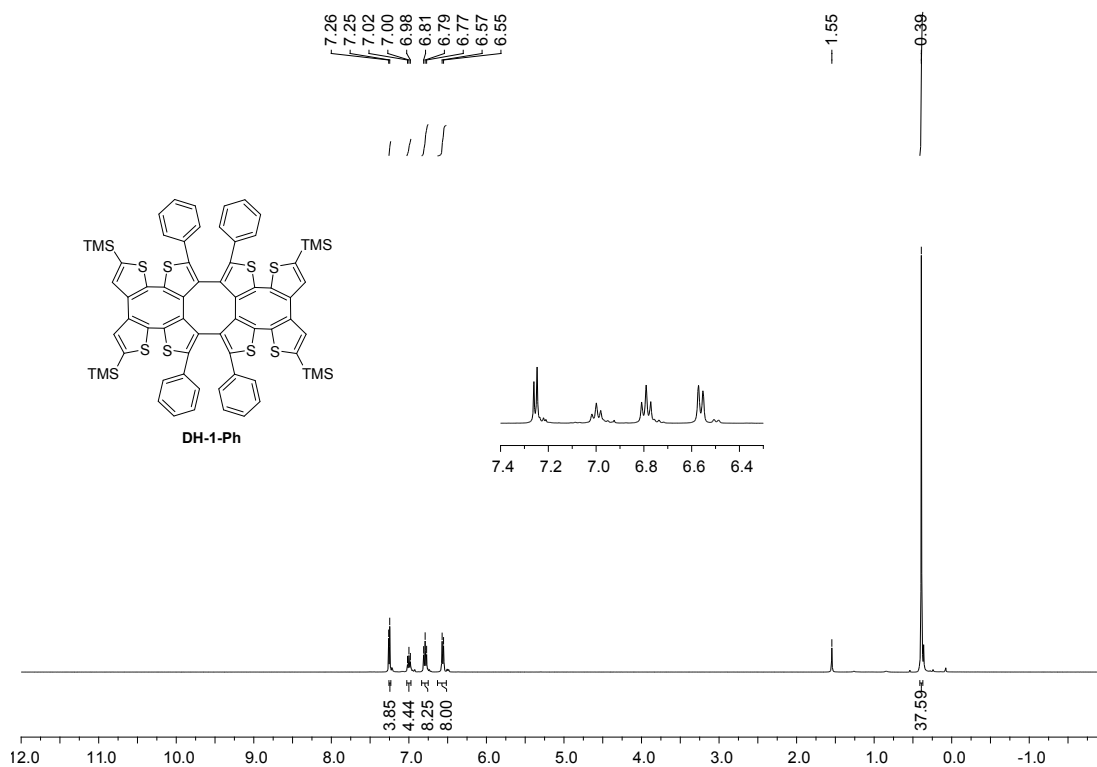

Figure S9.  $^1\text{H}$  NMR (CDCl<sub>3</sub>, 400 MHz) spectrum of **DH-1-Ph**

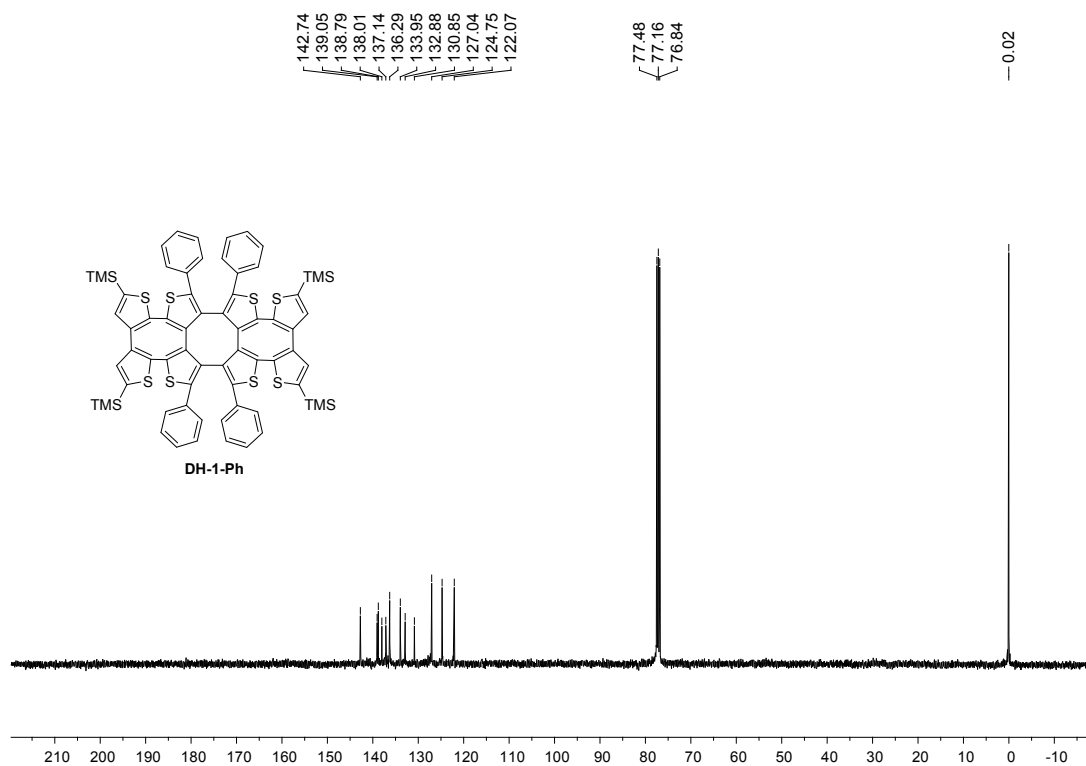

Figure S10.  $^{13}\text{C}$  NMR (CDCl<sub>3</sub>, 100 MHz) spectrum of **DH-1-Ph**

**LBB-5-11:** HRMS (ESI)  $m/z$  calcd for  $C_{68}H_{61}S_8Si_4^+$   $(M+H)^+$  1245.16105, found

1245.16152.

00034 #13 RT: 0.20 AV: 1 NL: 1.04E4  
T: FTMS+p E9 Full ms [400.00-2000.00]

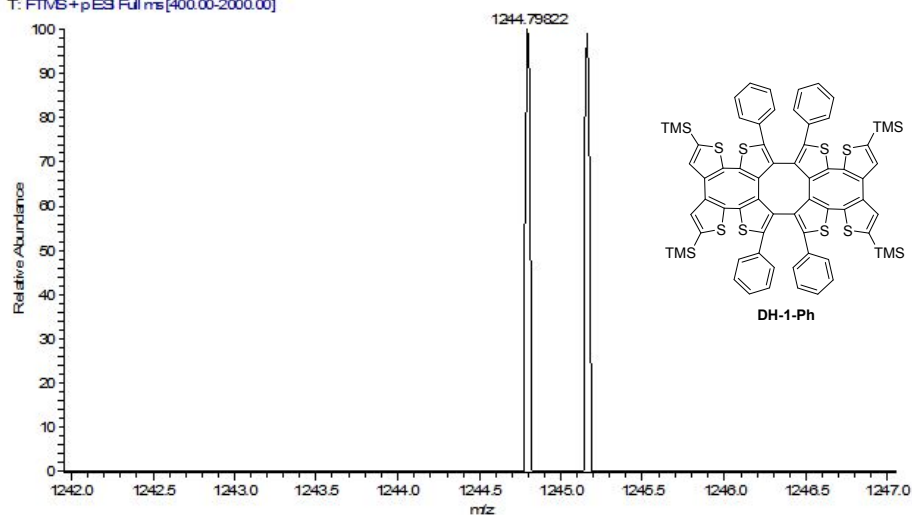

Figure S11. HRMS spectrum of **DH-1-Ph**

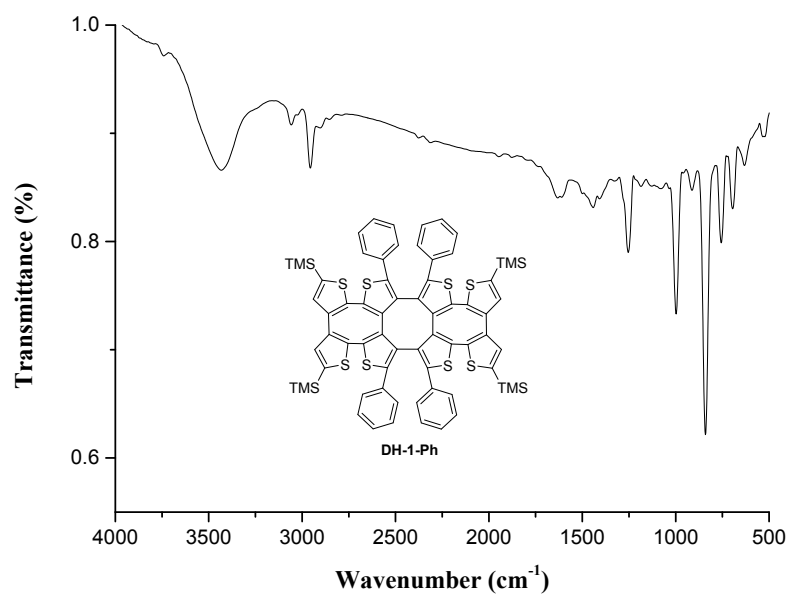

Figure S12. IR spectrum of **DH-1-Ph**

## NMR, HRMS and IR Spectra of DH-1-Th

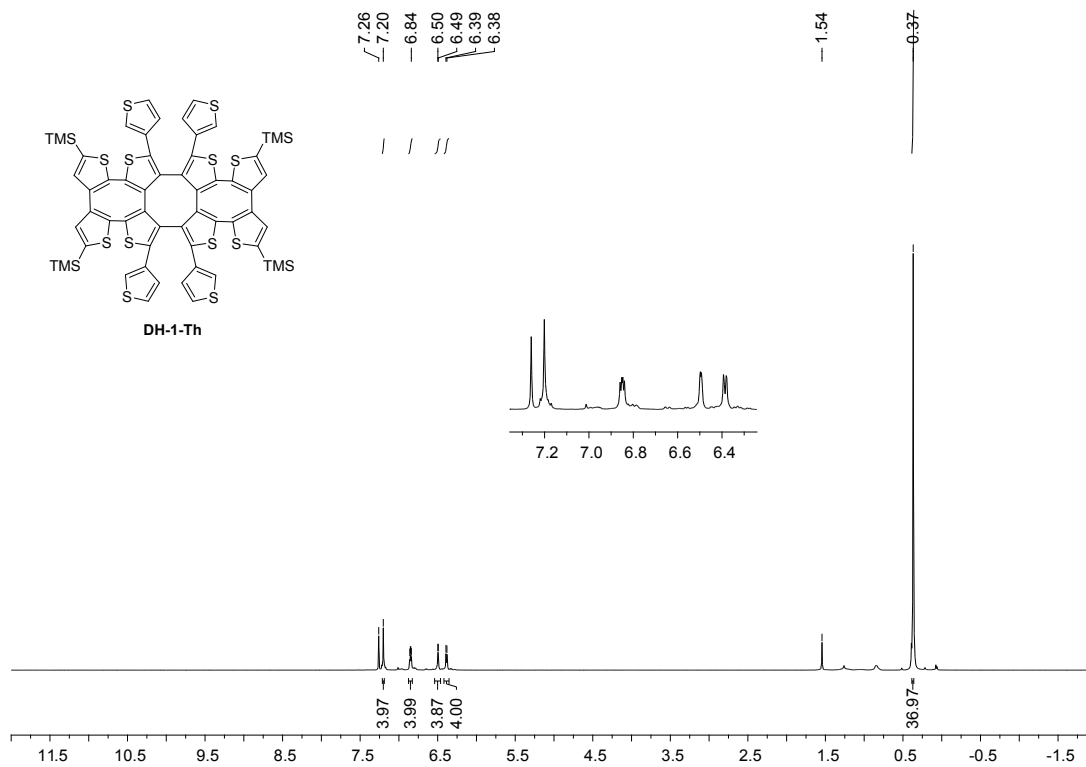

Figure S13. <sup>1</sup>H NMR (CDCl<sub>3</sub>, 400 MHz) spectrum of DH-1-Th

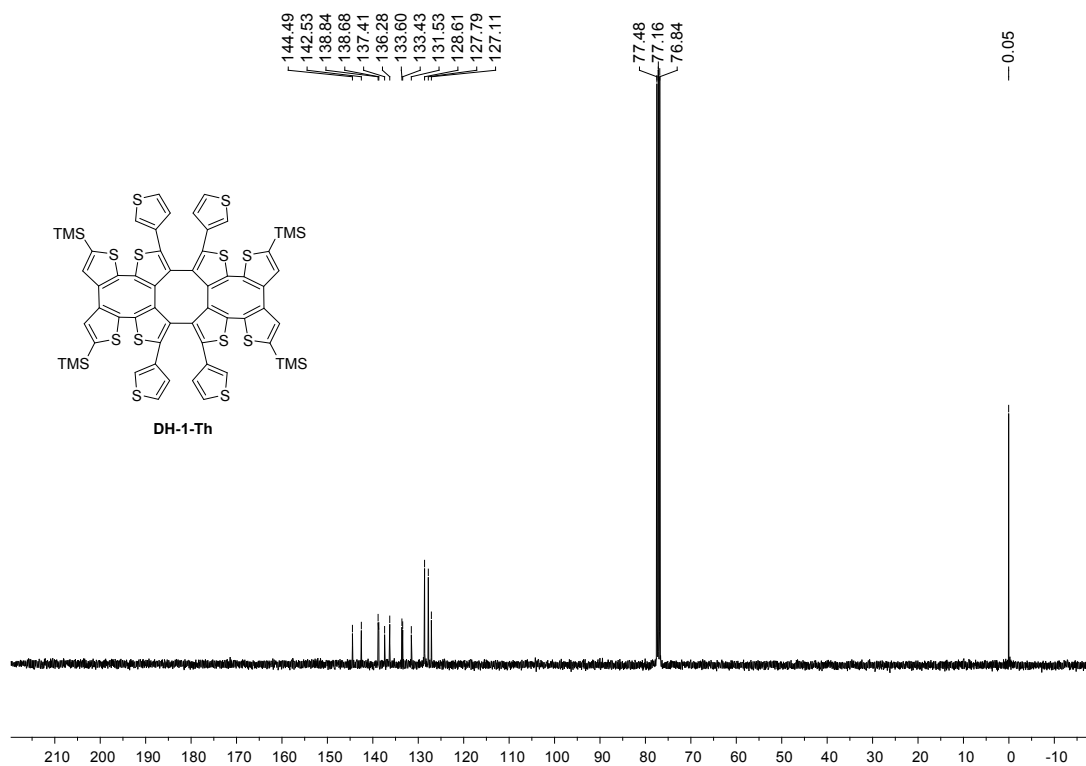

Figure S14. <sup>13</sup>C NMR (CDCl<sub>3</sub>, 100 MHz) spectrum of DH-1-Th



**LBB-5-13:** HRMS (ESI)  $m/z$  calcd for  $C_{60}H_{53}S_{12}Si_4^+$   $(M+H)^+$  1268.98673, found

1268.98865.<sup>4</sup>

00033 #22 RT: 0.37 AV: 1 NL: 8.84E4  
T: FTMS+p.E3 Full ms [400.00-2000.00]

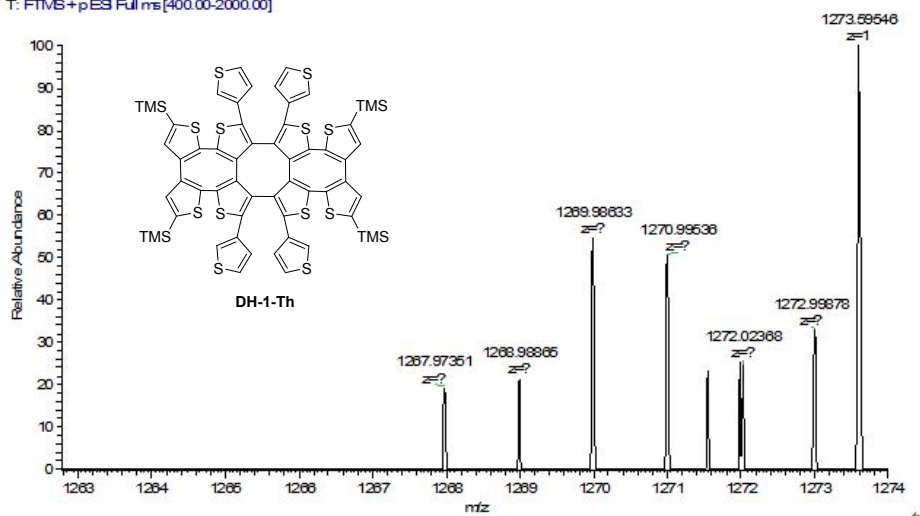

Figure S15. HRMS spectrum of **DH-1-Th**

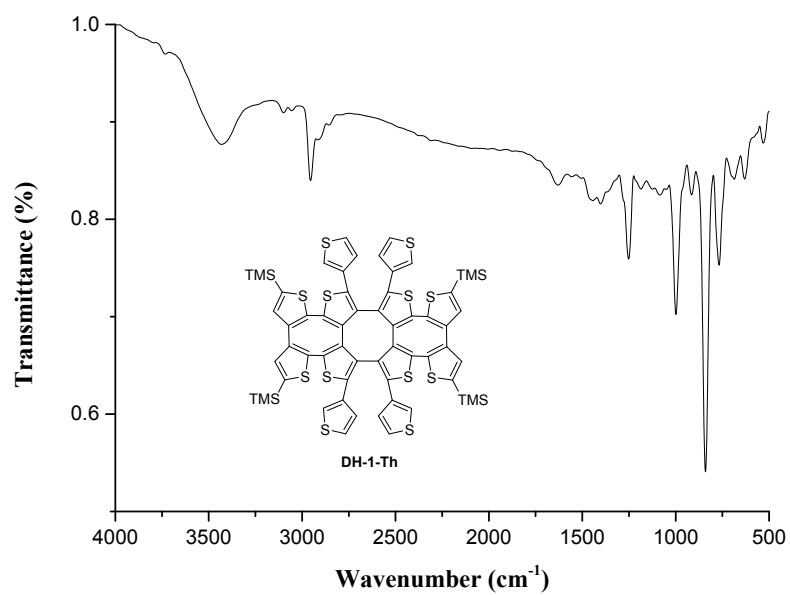

Figure S16. IR spectrum of **DH-1-Th**

## Resolution of *rac*-DH-1

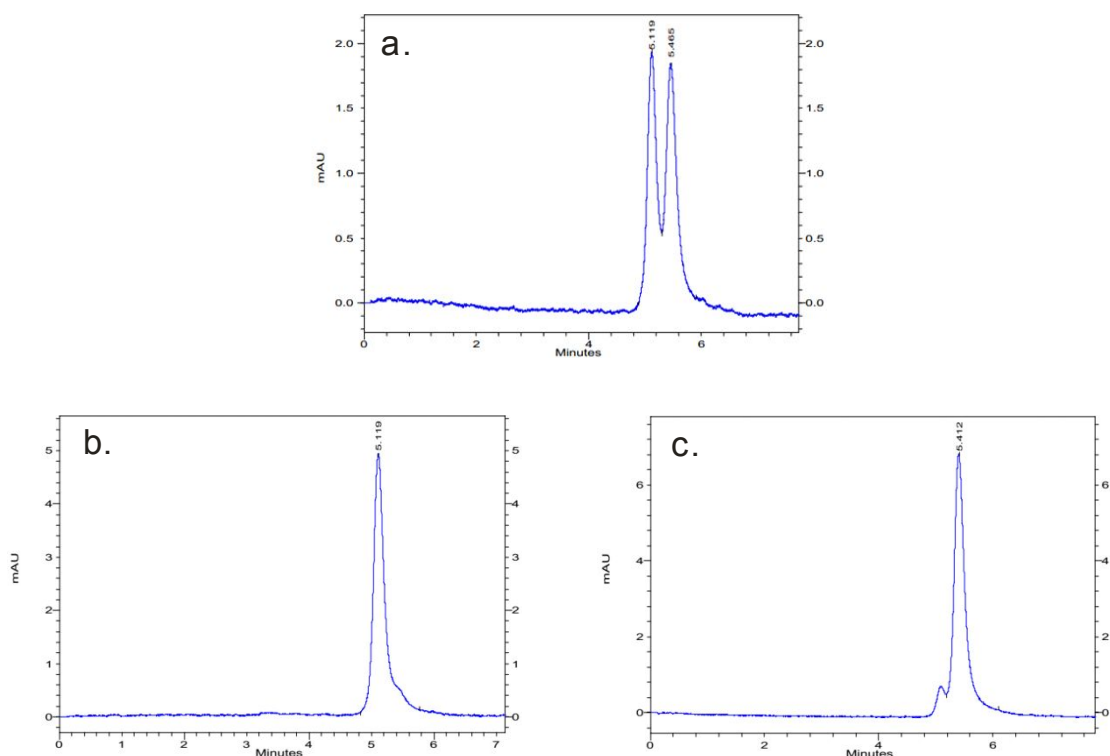

Figure S17. HPLC spectra of (a) *rac*-DH-1, (b) (-)-DH-1 and (c) (+)-DH-1 (*n*-hexane/isopropanol (99.5:0.5, v/v), flow rate: 1.0 mL/min).

## Table S1. X-ray crystallographic data of DH-1

|                                 |                                                                                                                     |
|---------------------------------|---------------------------------------------------------------------------------------------------------------------|
| Identification code             | <b>DH-1</b>                                                                                                         |
| Empirical formula               | C <sub>46</sub> H <sub>46</sub> C <sub>16</sub> S <sub>8</sub> Si <sub>4</sub>                                      |
| Formula weight                  | 1180.37                                                                                                             |
| Temperature                     | 296(2) K                                                                                                            |
| Wavelength                      | 0.71073 Å                                                                                                           |
| Crystal system, space group     | Triclinic, P-1                                                                                                      |
| Unit cell dimensions            | a = 11.9267(15) Å    α = 108.373(2) °<br>b = 15.095(2) Å    β = 105.652(2) °<br>c = 17.872(2) Å    γ = 101.258(2) ° |
| Volume                          | 2798.7(6) Å <sup>3</sup>                                                                                            |
| Z, Calculated density           | 2, 1.401 Mg/m <sup>3</sup>                                                                                          |
| Absorption coefficient          | 0.723 mm <sup>-1</sup>                                                                                              |
| F(000)                          | 1216                                                                                                                |
| Crystal size                    | 0.33 × 0.21 × 0.17 mm                                                                                               |
| Theta range for data collection | 1.54 to 25.00 °                                                                                                     |
| Limiting indices                | -13 ≤ h ≤ 14, -17 ≤ k ≤ 17, -21 ≤ l ≤ 21                                                                            |
| Reflections collected / unique  | 14179 / 9774 [R(int) = 0.0263]                                                                                      |

|                                   |                                             |
|-----------------------------------|---------------------------------------------|
| Completeness to theta = 25.00     | 99.20%                                      |
| Max. and min. transmission        | 0.8869 and 0.7963                           |
| Refinement method                 | Full-matrix least-squares on F <sup>2</sup> |
| Data / restraints / parameters    | 9774 / 36 / 577                             |
| Goodness-of-fit on F <sup>2</sup> | 1.079                                       |
| Final R indices [I>2sigma(I)]     | R1 = 0.0658, wR2 = 0.1598                   |
| R indices (all data)              | R1 = 0.0855, wR2 = 0.1708                   |
| Largest diff. peak and hole       | 1.806 and -1.899 e. Å <sup>-3</sup>         |

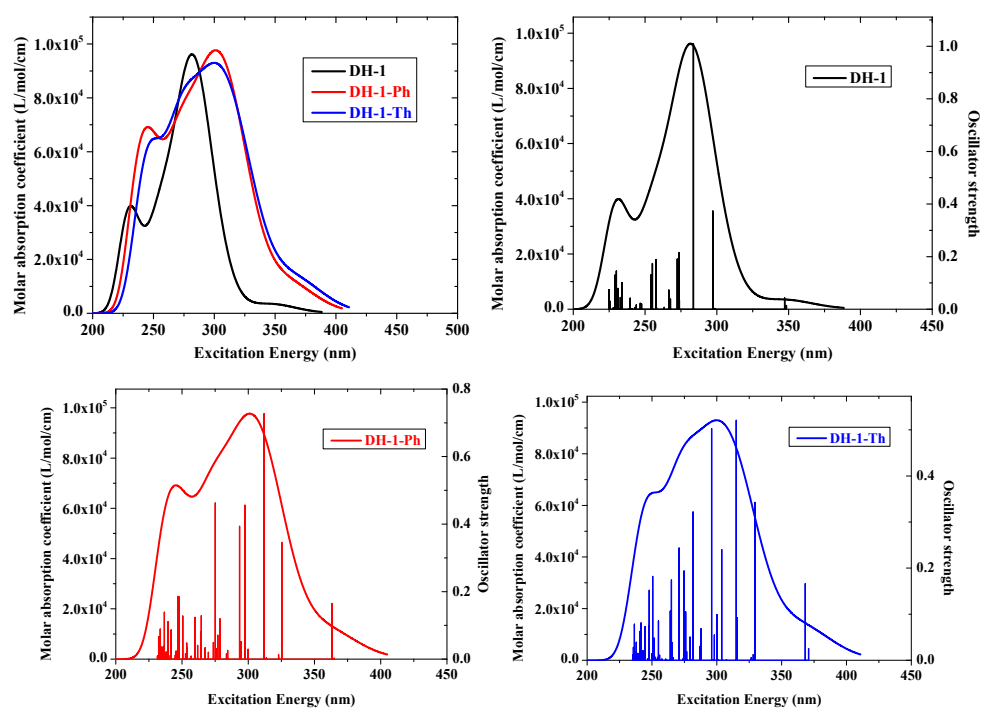

Figure S18. Calculated absorption spectra of **DH-1**, **DH-1-Ph** and **DH-1-Th** in dichloromethane solution using TDDFT/PCM approaches.

Table S2. The peaks position (nm, experimental values in parentheses) of the predicted UV-vis spectra and computational absorption energies ( $\lambda$ , nm), oscillator strength ( $f$ ), and transition nature and the square of transition dipole moment between the excited-state and ground-state ( $\mu_{eg}^2$ ).

|                | Peaks position | states                   | $\lambda$ (nm) | $f$    | Transition contributions                                                                                    | $\mu_{eg}^2$ |
|----------------|----------------|--------------------------|----------------|--------|-------------------------------------------------------------------------------------------------------------|--------------|
| <b>DH-1</b>    | 231 (231)      | $S_0 \rightarrow S_{37}$ | 233.7          | 0.1013 | HOMO-6 $\rightarrow$ LUMO+3 (10%)<br>HOMO-4 $\rightarrow$ LUMO+3 (36%)<br>HOMO-1 $\rightarrow$ LUMO+6 (21%) | 0.7798       |
|                | 282 (281)      | $S_0 \rightarrow S_7$    | 283.5          | 1.0098 | HOMO-1 $\rightarrow$ LUMO+3 (37%)<br>HOMO $\rightarrow$ LUMO+2 (58%)                                        | 9.4248       |
|                | 347 (344)      | $S_0 \rightarrow S_2$    | 346.9          | 0.0424 | HOMO-1 $\rightarrow$ LUMO+1 (45%)<br>HOMO $\rightarrow$ LUMO (53%)                                          | 0.4842       |
| <b>DH-1-Ph</b> | 245 (239)      | $S_0 \rightarrow S_{47}$ | 247.6          | 0.1845 | HOMO-15 $\rightarrow$ LUMO (14%)                                                                            | 1.5042       |

|                |           |                                 |       |        |                                                                  |        |
|----------------|-----------|---------------------------------|-------|--------|------------------------------------------------------------------|--------|
|                |           |                                 |       |        | HOMO-11→LUMO(26%)<br>HOMO-1→LUMO+8(17%)                          |        |
|                |           | S <sub>0</sub> →S <sub>48</sub> | 246.6 | 0.1856 | HOMO-11→LUMO+1(18%)<br>HOMO→LUMO+8(18%)                          | 1.5065 |
|                |           | S <sub>0</sub> →S <sub>59</sub> | 239.3 | 0.111  | HOMO-11→LUMO+2(23%)<br>HOMO-11→LUMO+3(33%)<br>HOMO-9→LUMO+5(15%) | 0.8747 |
|                | 300 (286) | S <sub>0</sub> →S <sub>8</sub>  | 311.8 | 0.7275 | HOMO-4→LUMO+2(65%)<br>HOMO-4→LUMO+3(30%)                         | 7.4681 |
|                |           | S <sub>0</sub> →S <sub>11</sub> | 297.2 | 0.4558 | HOMO-5→LUMO+2(94%)                                               | 4.4600 |
|                |           | S <sub>0</sub> →S <sub>14</sub> | 293.2 | 0.3934 | HOMO-5→LUMO+1(80%)                                               | 3.7968 |
|                |           | S <sub>0</sub> →S <sub>2</sub>  | 362.8 | 0.1648 | HOMO-2→LUMO (53%)<br>HOMO-2→LUMO+1(42%)                          | 1.9686 |
| <b>DH-1-Th</b> | 250 (239) | S <sub>0</sub> →S <sub>48</sub> | 250.3 | 0.1818 | HOMO-9→LUMO+6(41%)<br>HOMO-8→LUMO+7(27%)                         | 1.4978 |
|                |           | S <sub>0</sub> →S <sub>51</sub> | 247.7 | 0.1519 | HOMO-9→LUMO+6(14%)<br>HOMO-10→LUMO+8(13%)<br>HOMO-10→LUMO+9(19%) | 1.2389 |
|                | 300 (286) | S <sub>0</sub> →S <sub>8</sub>  | 314.8 | 0.5206 | HOMO-4→LUMO+2(25%)<br>HOMO-5→LUMO+3(48%)<br>HOMO-3→LUMO+2(23%)   | 5.3948 |
|                |           | S <sub>0</sub> →S <sub>10</sub> | 303.6 | 0.2401 | HOMO-5→LUMO+1(45%)<br>HOMO-5→LUMO+3(15%)<br>HOMO-3→LUMO+2(16%)   | 2.3998 |
|                |           | S <sub>0</sub> →S <sub>14</sub> | 295.8 | 0.5026 | HOMO-5→LUMO+2(93%)                                               | 4.8947 |
|                |           | S <sub>0</sub> →S <sub>2</sub>  | 368.0 | 0.1663 | HOMO-2→LUMO(24%)<br>HOMO-3→LUMO+1(49%)<br>HOMO-1→LUMO (22%)      | 2.0142 |
